# Supplementary material for: Re-membering the body: applications of computational neuroscience to the top-down control of regeneration of limbs and other complex organs
Source: Royal Society of Chemistry journal article supplement (doi:10.1039/c5ib00221d), 2015-01-01

(A)

**Normal Regeneration**

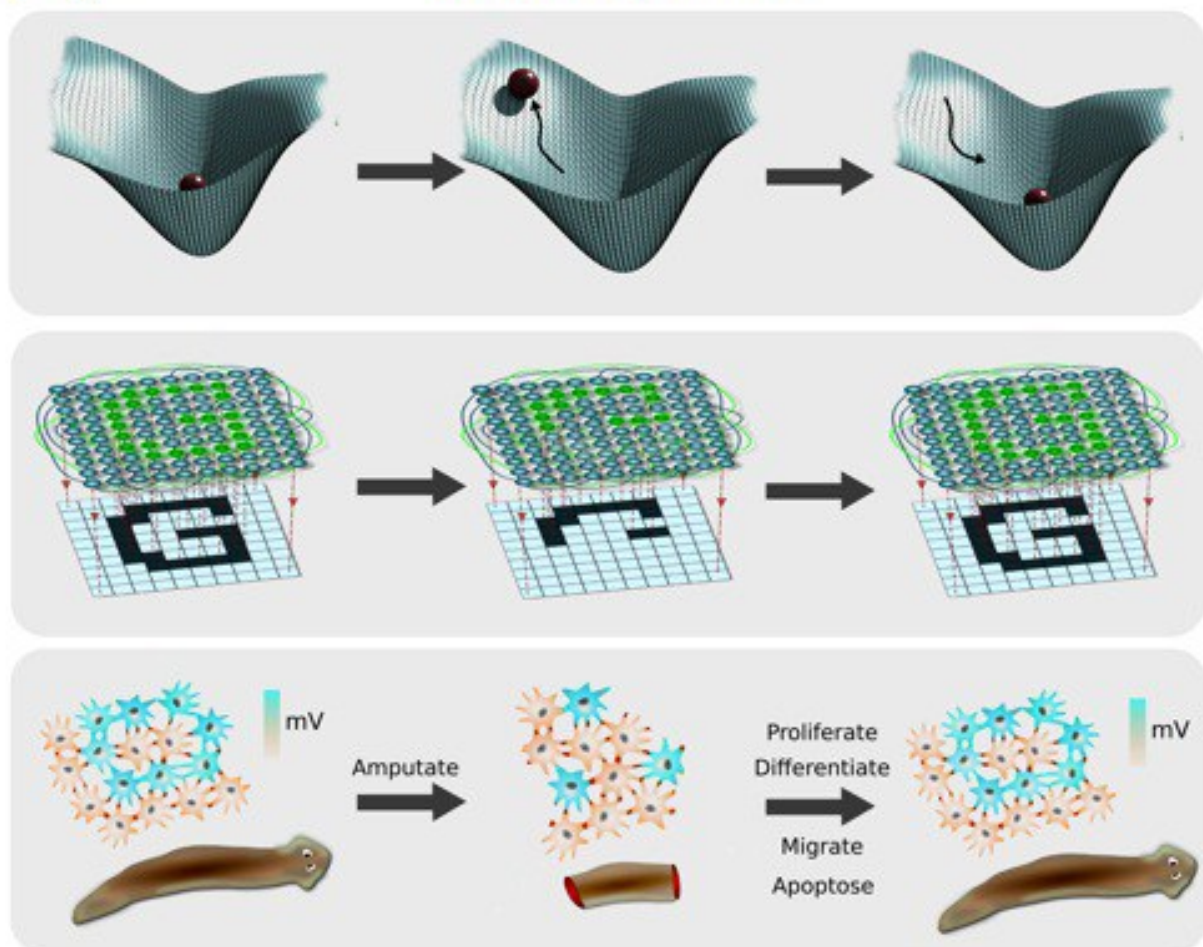

(B)

**Altered Regeneration**

energy  
landscape  
view

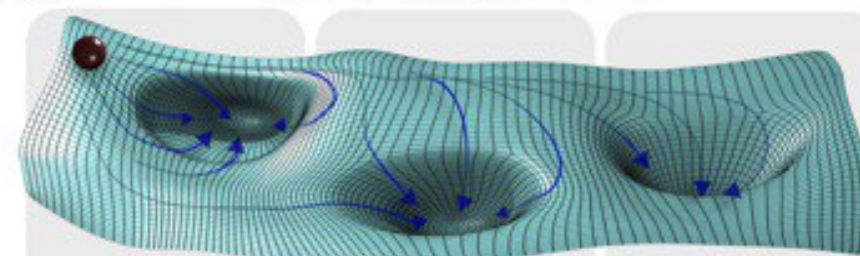

bioelectric  
network  
view

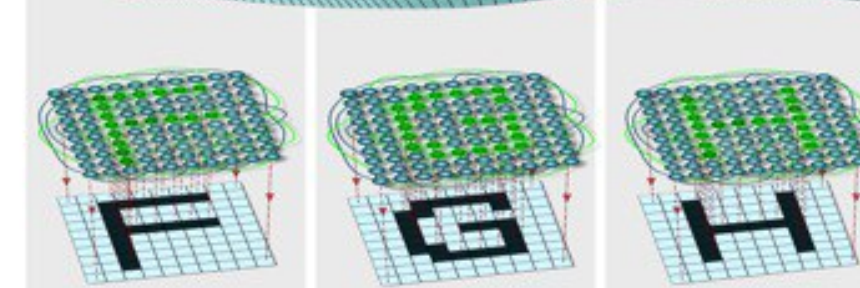

biological  
output  
view

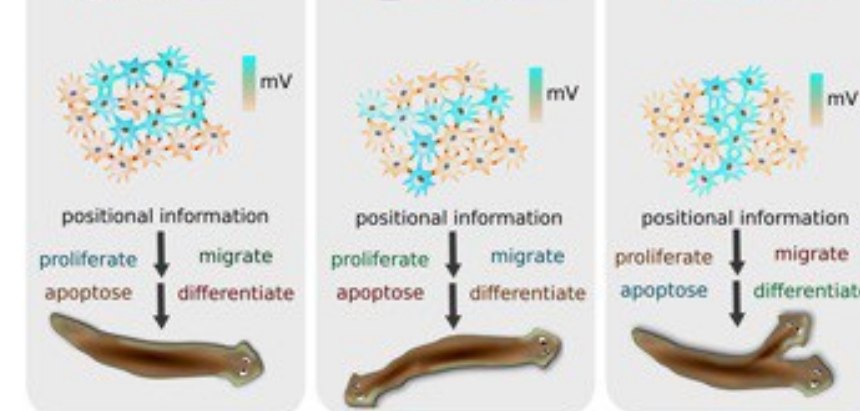

(C)

**Optogenetic Intervention**

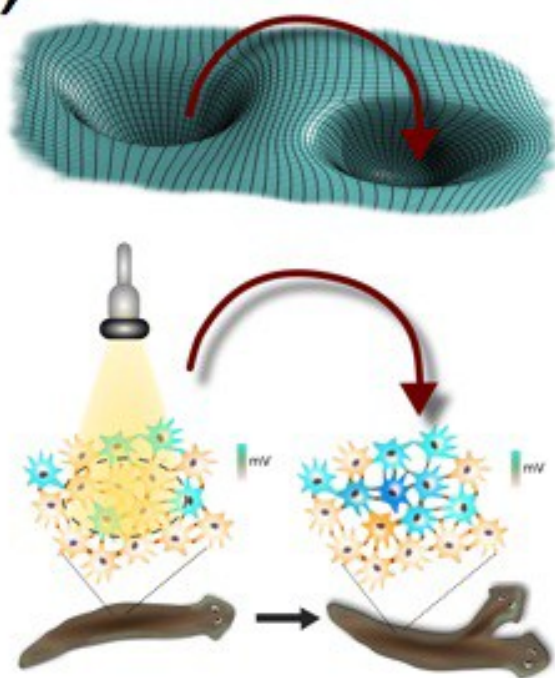

Supplement: c5ib00221d3.pdf [file c5ib00221d3.pdf]
