# Supplementary figures and images for: Re-membering the body: applications of computational neuroscience to the top-down control of regeneration of limbs and other complex organs
Source: Royal Society of Chemistry journal article supplement (doi:10.1039/c5ib00221d), 2015-01-01

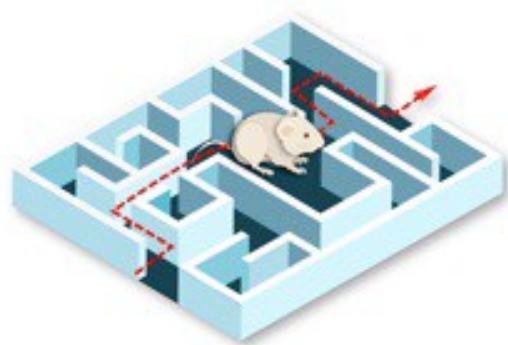

A

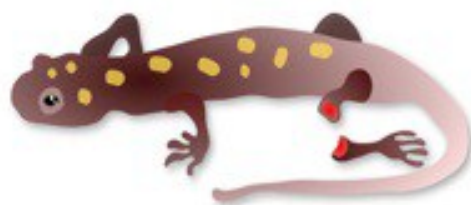

B

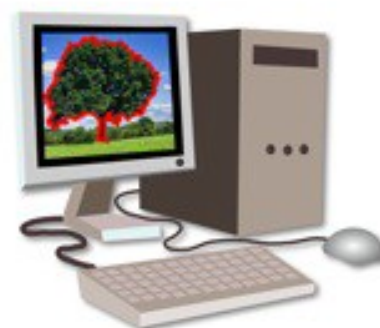

C

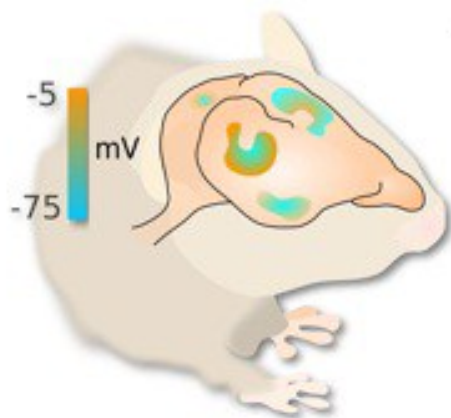

D

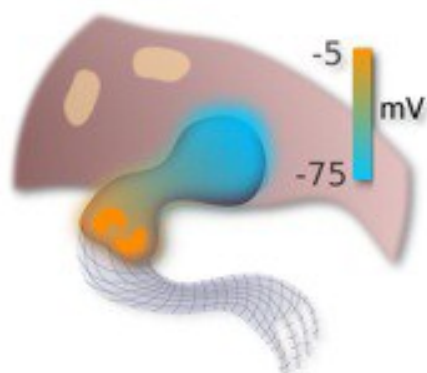

E

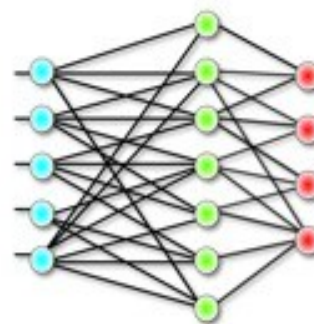

F

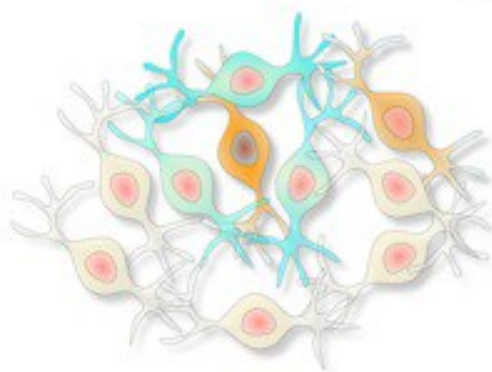

G

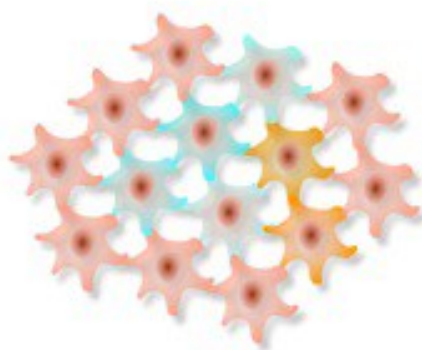

H

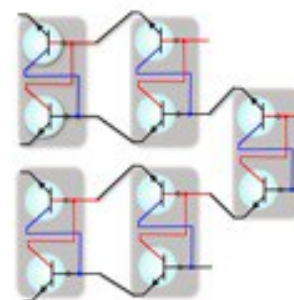

I

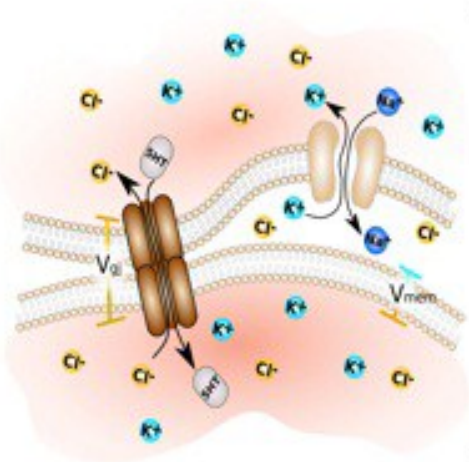

J

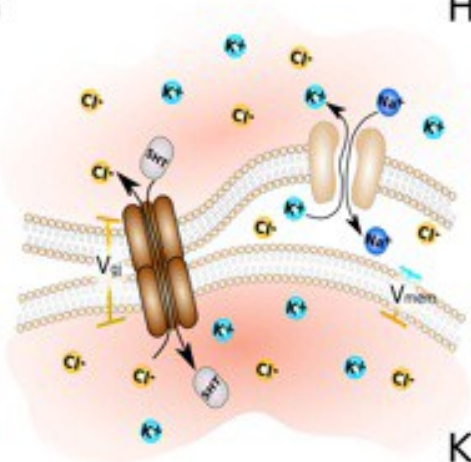

K

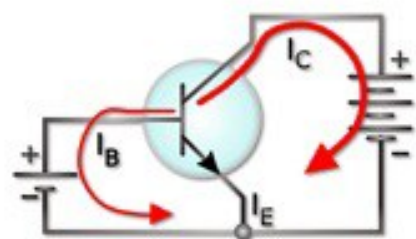

L

Supplement: c5ib00221d2.pdf [file c5ib00221d2.pdf]
